# Supplementary material for: Nicotinamide combined with gemcitabine is an immunomodulatory therapy that restrains pancreatic cancer in mice
Source: PubMed Central journal article supplement — J Immunother Cancer. 2020 Nov 5;8(2):e001250. doi: 10.1136/jitc-2020-001250 (PMC7646363; doi:10.1136/jitc-2020-001250), 2020-11-05
Supplement: jitc-2020-001250supp003.pdf [file jitc-2020-001250supp003.pdf]

**Table S1: Pathways analyzed by Nanostring**

---

| <b>Category</b>          | <b>Number of genes analyzed</b> |
|--------------------------|---------------------------------|
| Adhesion                 | 65                              |
| Antigen processing       | 34                              |
| Apoptosis                | 111                             |
| Basic cell functions     | 56                              |
| Cancer progression       | 57                              |
| CD molecules             | 212                             |
| Cell cycle               | 36                              |
| Chemokines and receptors | 84                              |
| Cytokines and receptors  | 191                             |
| Dendritic cell functions | 17                              |
| Interferon               | 40                              |
| Interleukins             | 128                             |
| Leukocyte functions      | 41                              |
| Macrophage functions     | 45                              |
| MHC                      | 33                              |
| NK cell functions        | 53                              |
| Pathogen functions       | 29                              |
| Regulation               | 110                             |
| Senescence               | 22                              |
| T cell functions         | 200                             |
| TLR                      | 26                              |
| TNF superfamily          | 34                              |
| Transporter functions    | 99                              |

---
