# Supplementary figures and images for: Nicotinamide combined with gemcitabine is an immunomodulatory therapy that restrains pancreatic cancer in mice
Source: PubMed Central journal article supplement — J Immunother Cancer. 2020 Nov 5;8(2):e001250. doi: 10.1136/jitc-2020-001250 (PMC7646363; doi:10.1136/jitc-2020-001250), 2020-11-05

Figure S1

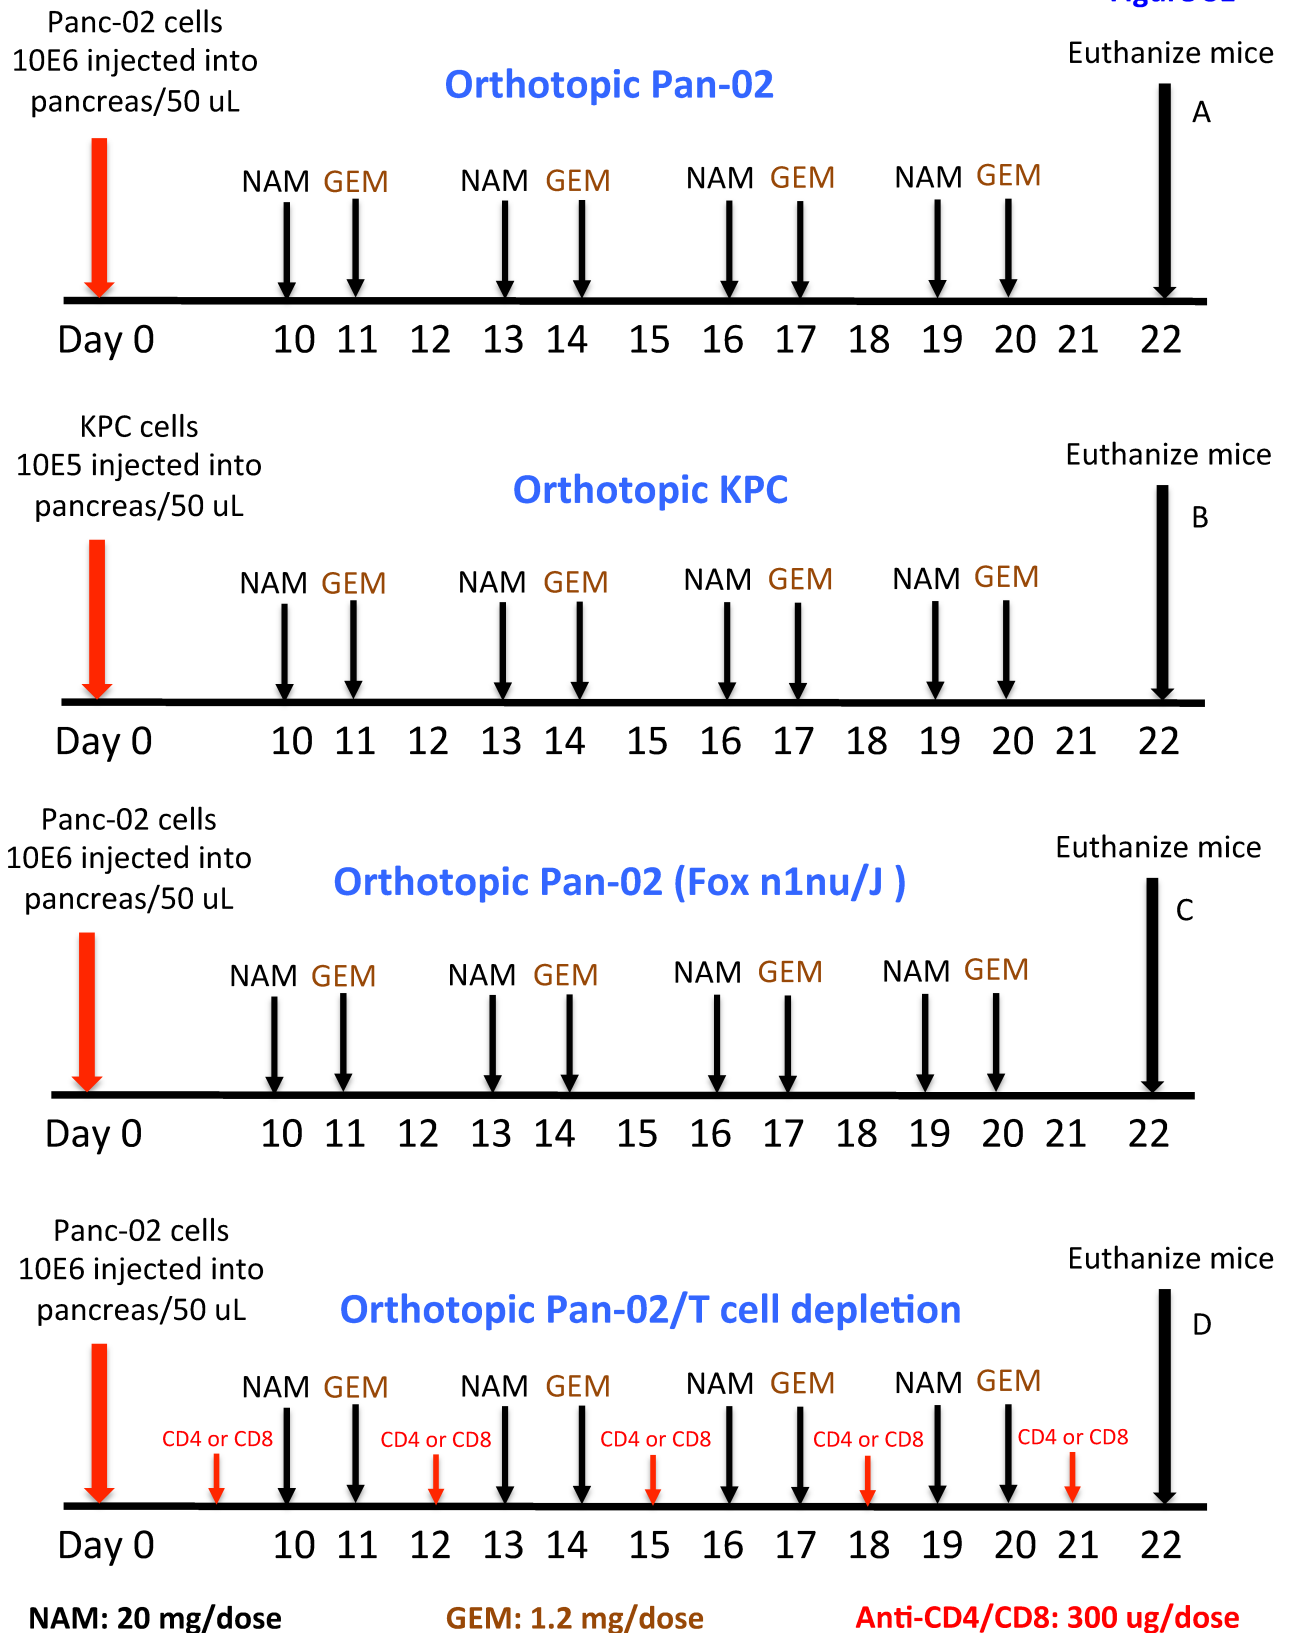

Supplement: jitc-2020-001250supp002.pdf [file jitc-2020-001250supp002.pdf]

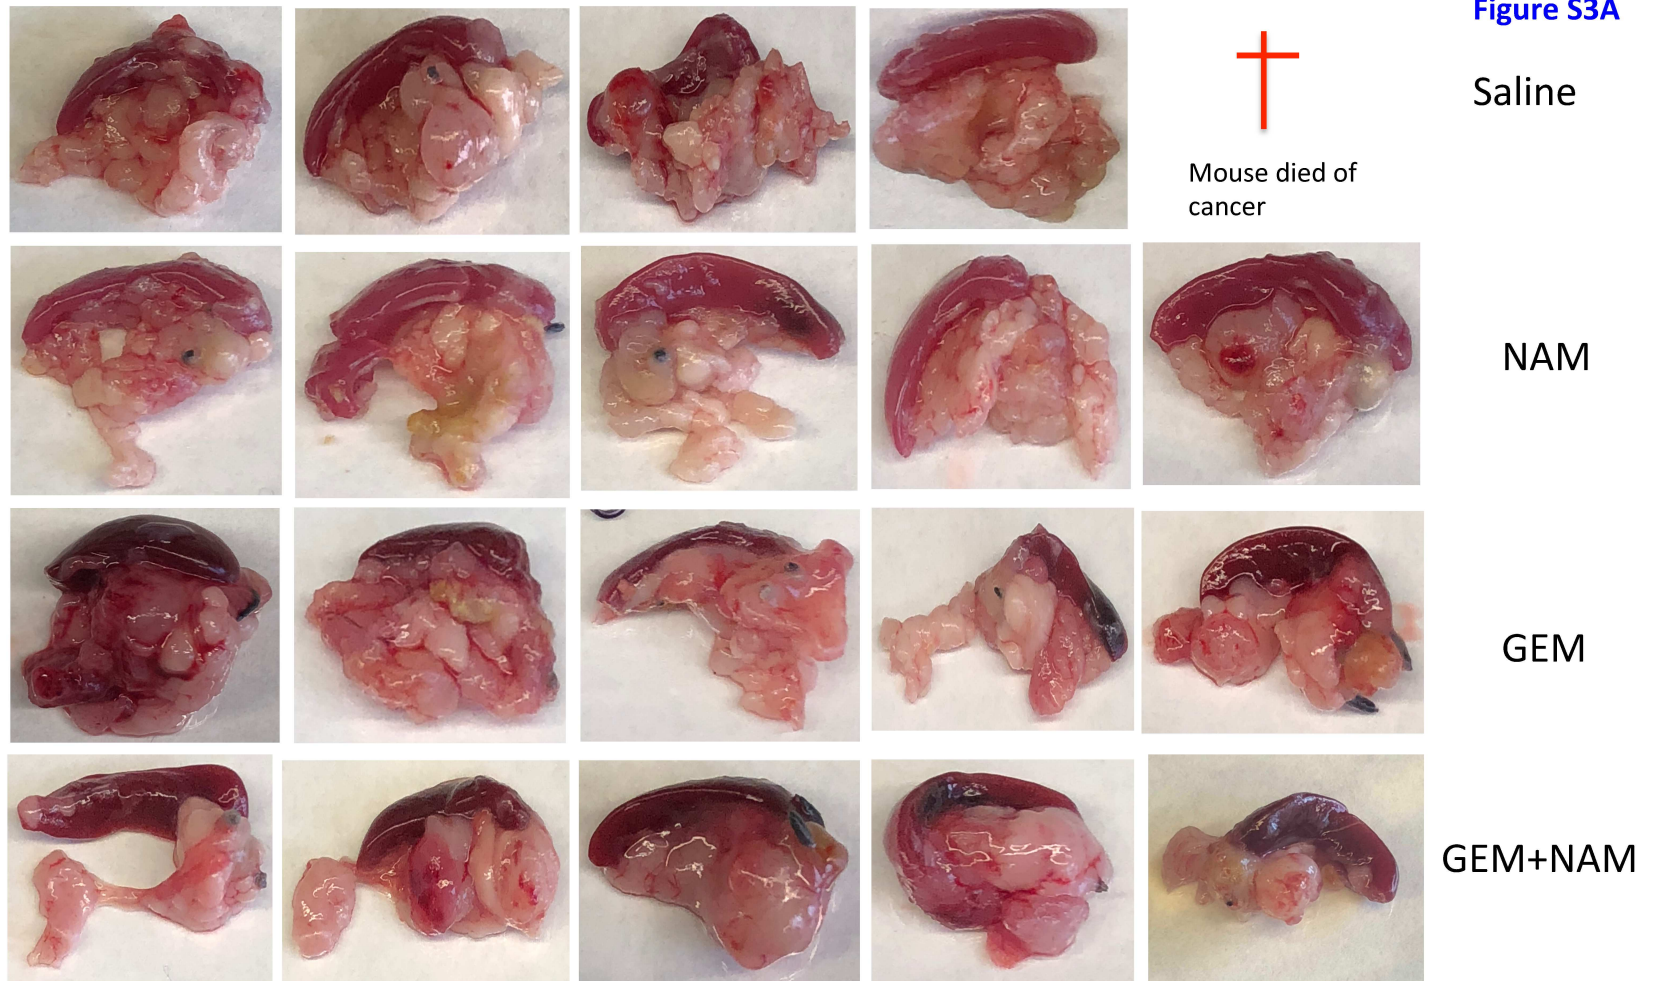

### Orthotopic Panc-02 model

Figure S3B

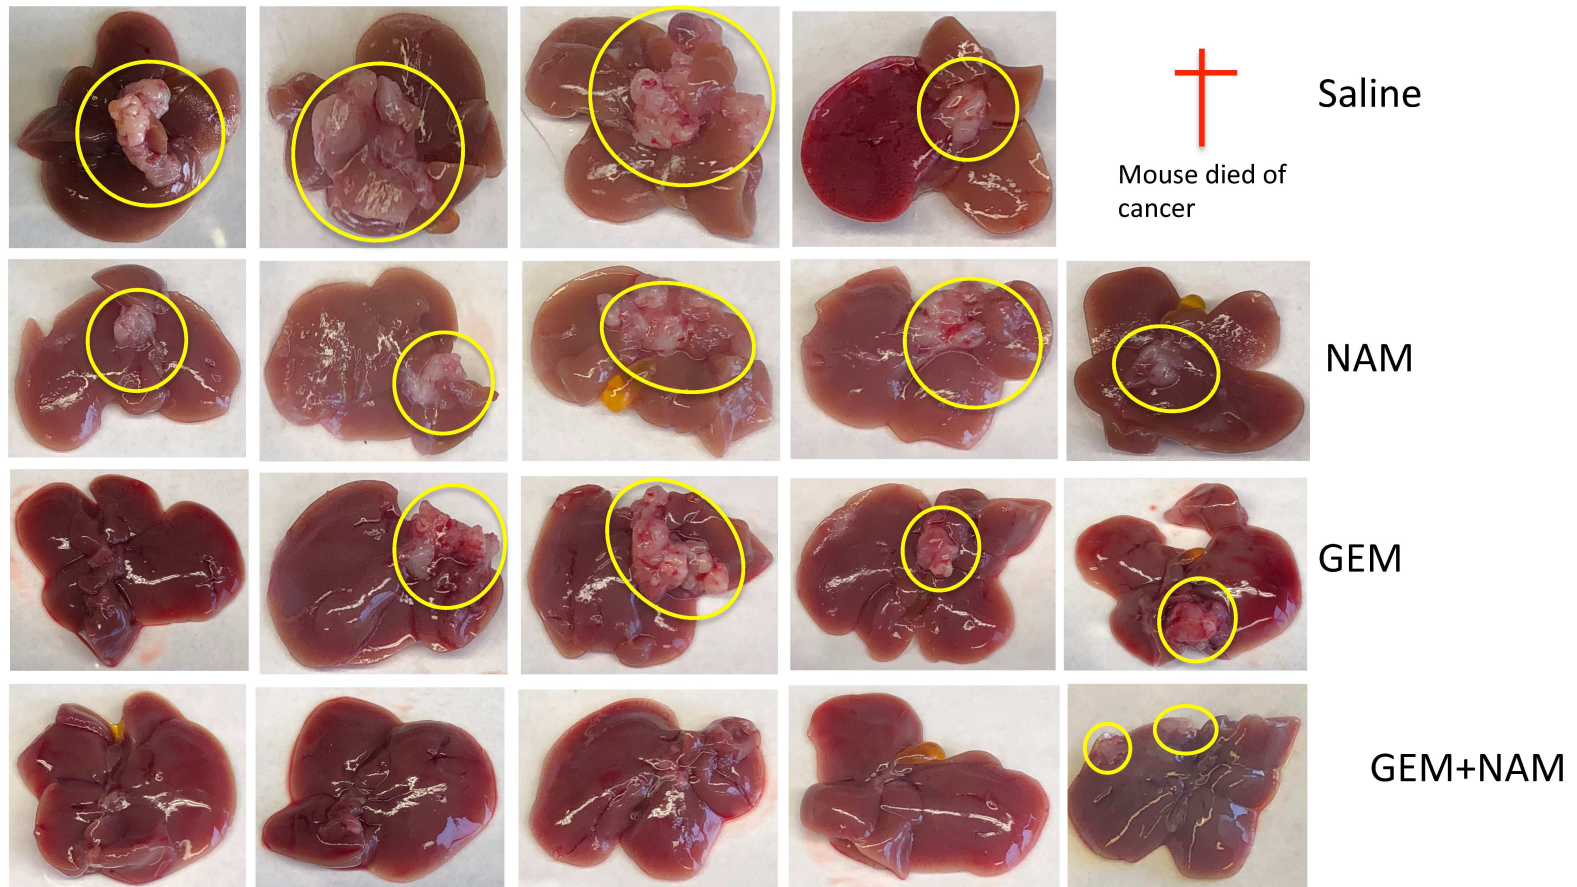

### Orthotopic Panc-02 model

Supplement: jitc-2020-001250supp005.pdf [file jitc-2020-001250supp005.pdf]

**Figure S6**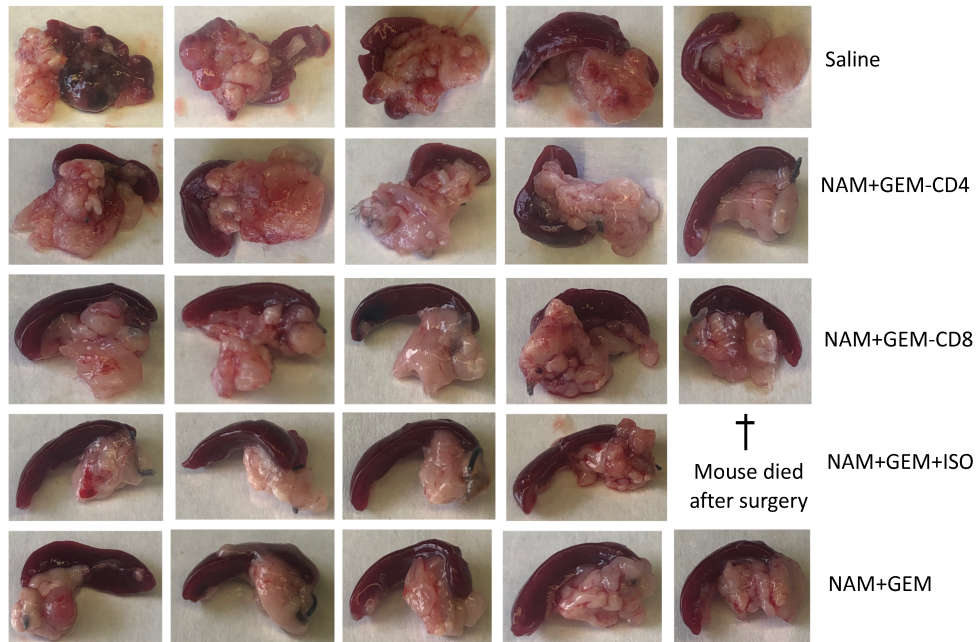**CD4 and CD8 T cell depletions in orthotopic Panc-02 mice**

Supplement: jitc-2020-001250supp008.pdf [file jitc-2020-001250supp008.pdf]

**Figure S7**

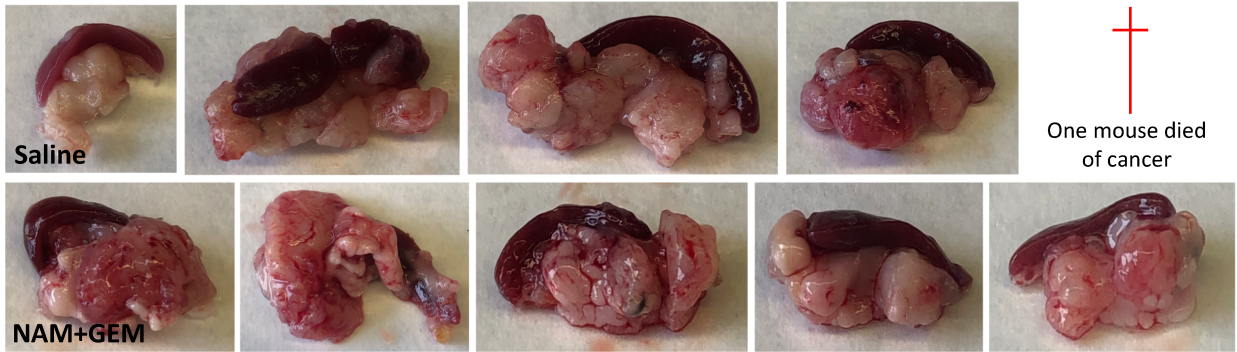

**Orthotopic Panc-02 model in nude mice**

Supplement: jitc-2020-001250supp009.pdf [file jitc-2020-001250supp009.pdf]

**Figure S8A**

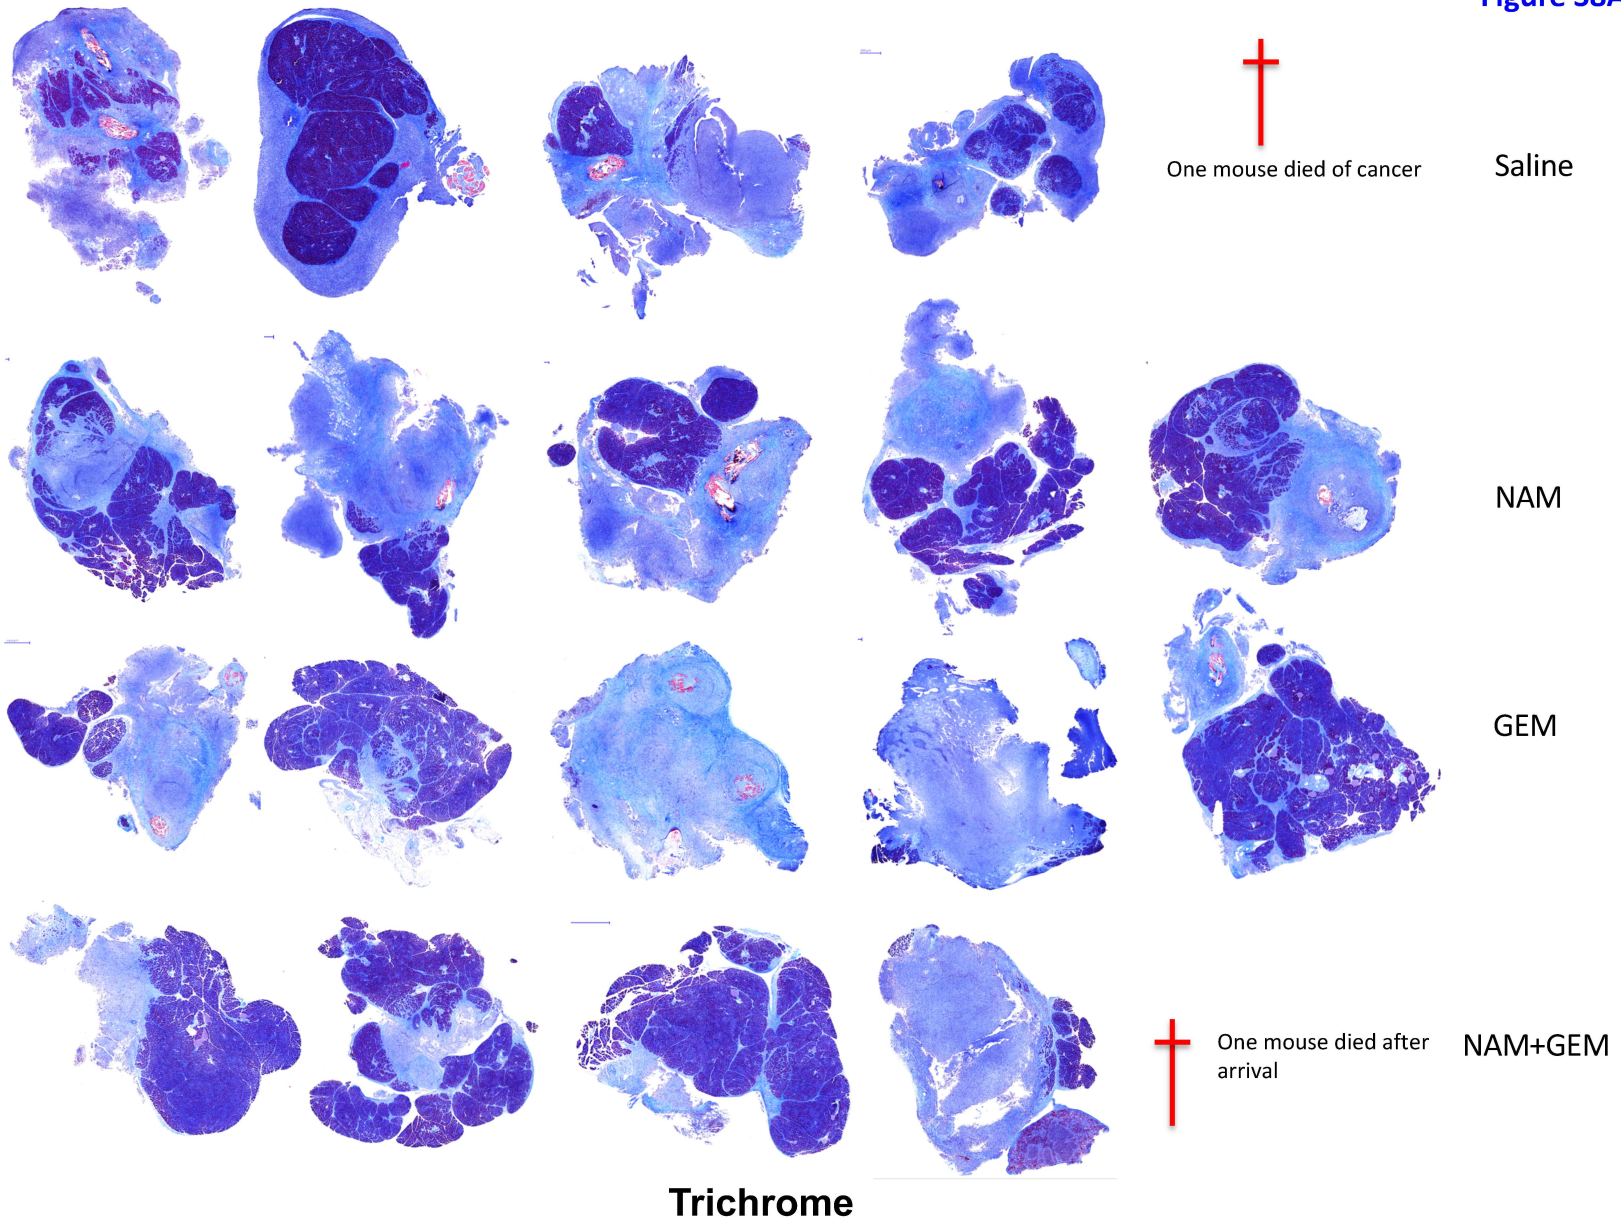

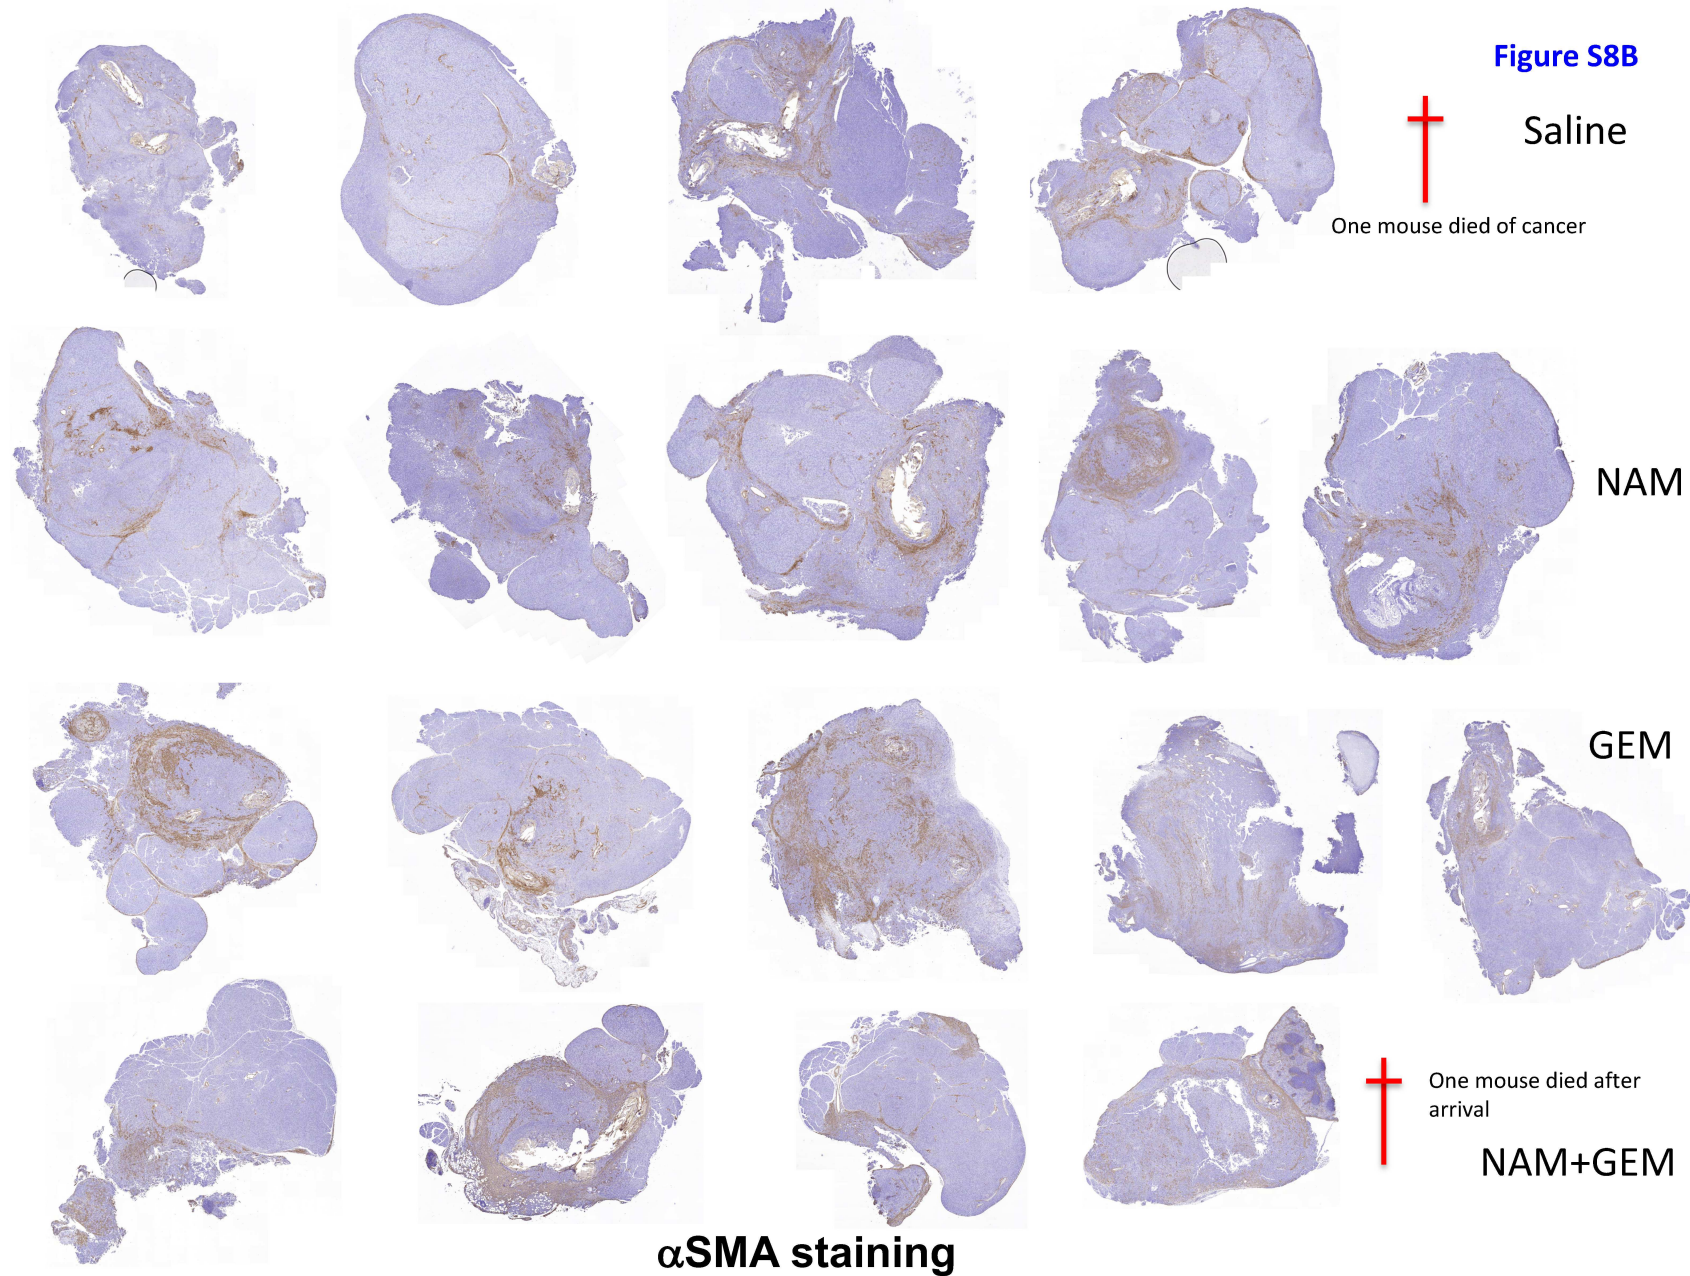

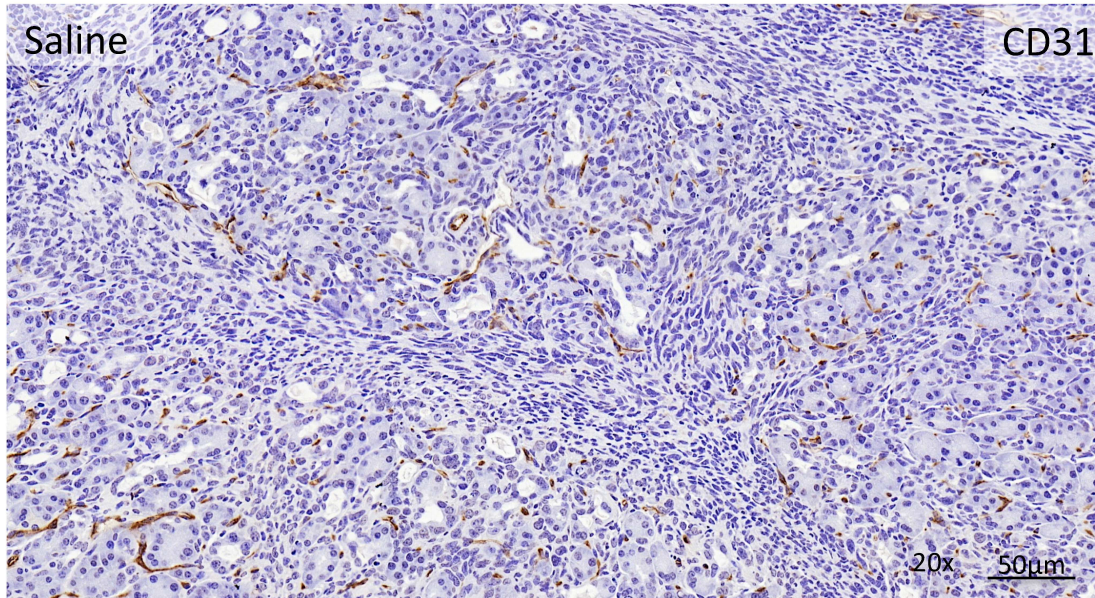

**Figure S8C**

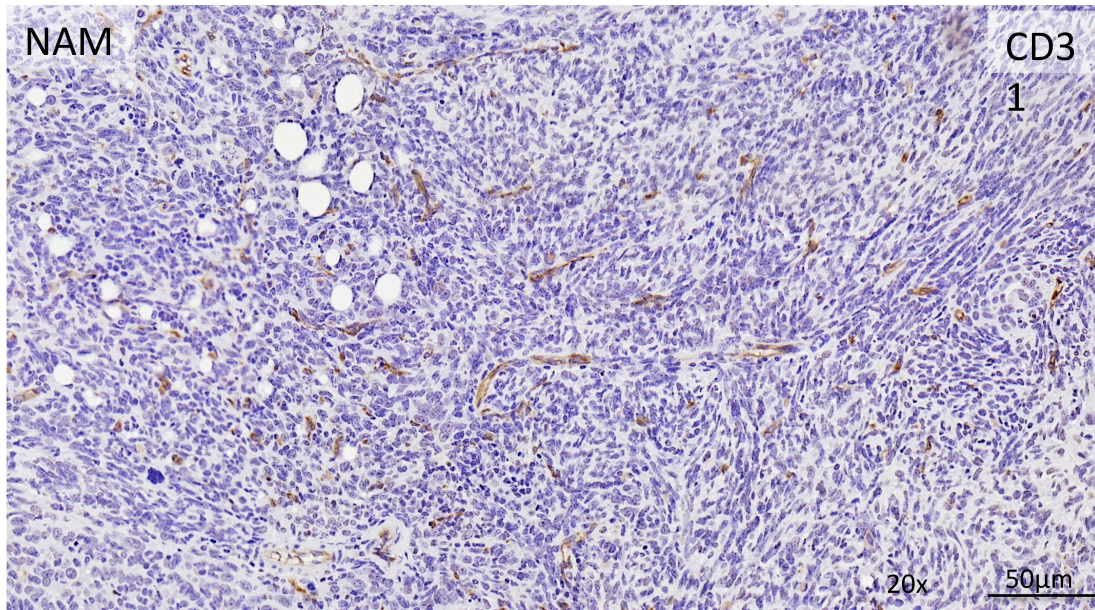

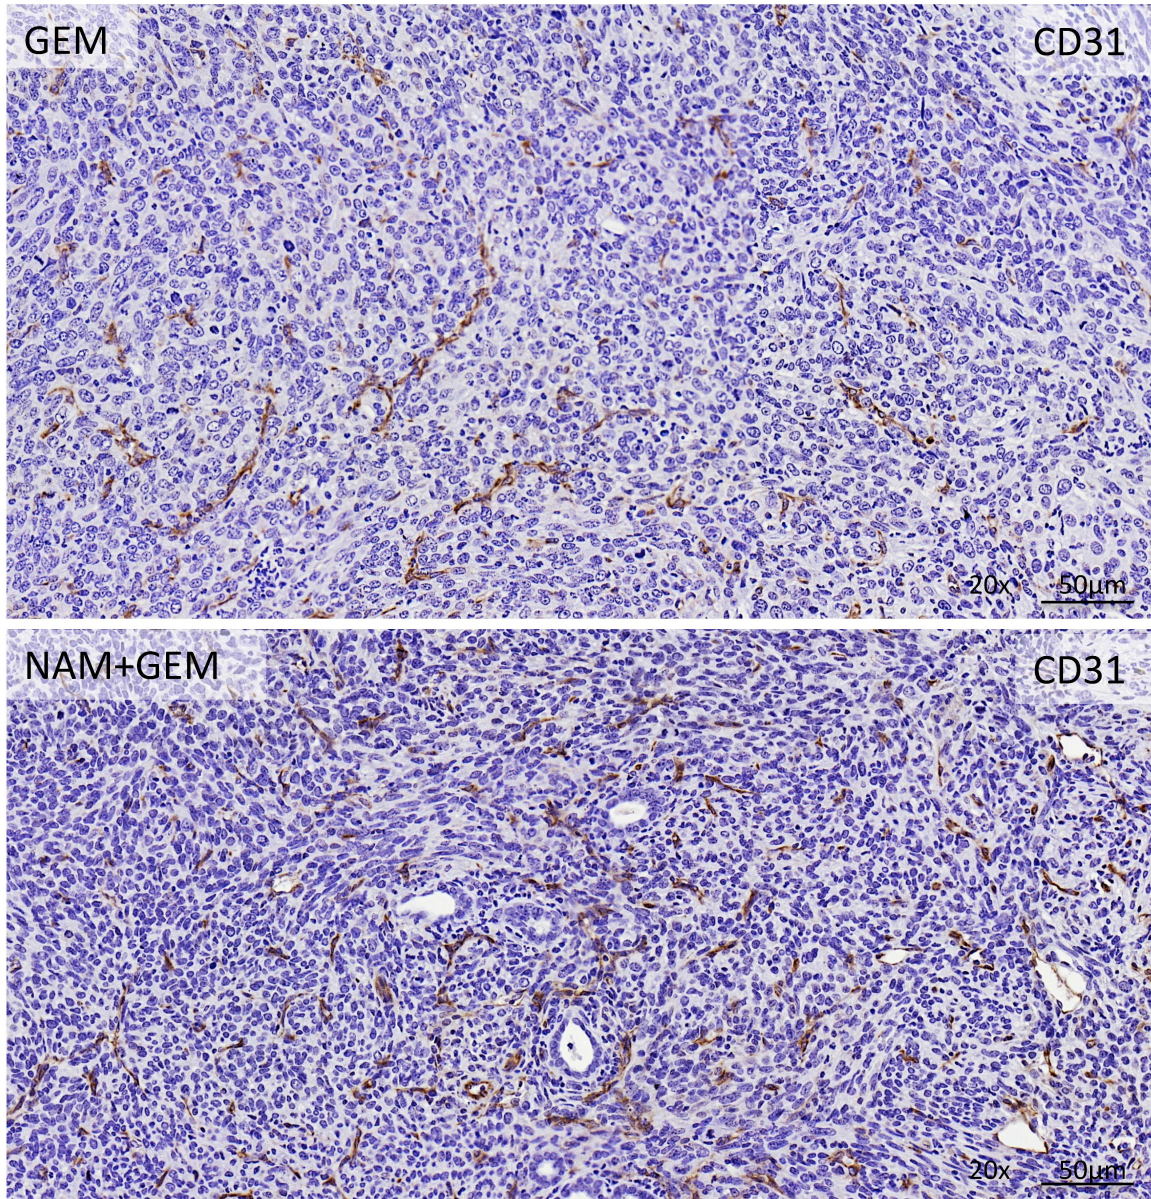

**Figure S8D**

Supplement: jitc-2020-001250supp010.pdf [file jitc-2020-001250supp010.pdf]

Figure S10

## Potential immune mechanisms of NAM+GEM in pancreatic cancer

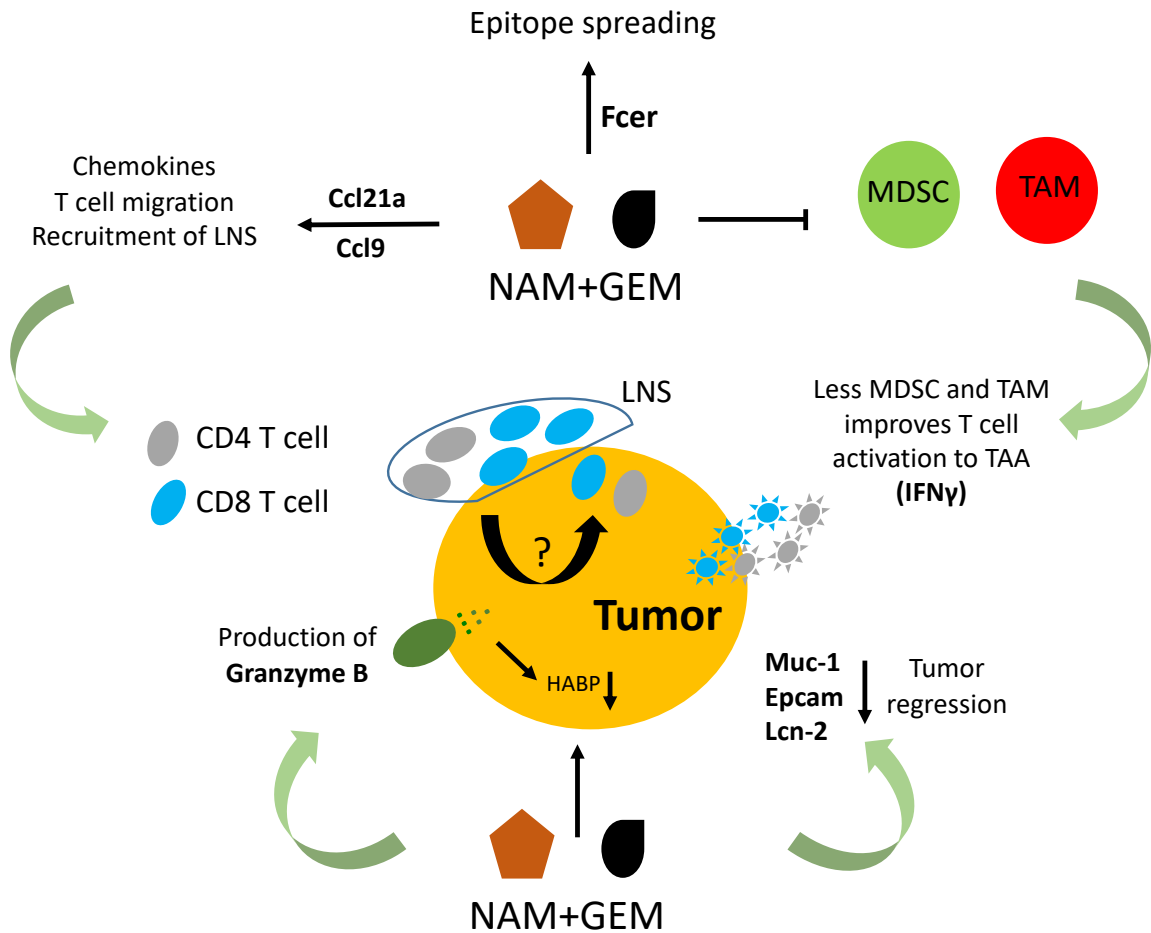

Supplement: jitc-2020-001250supp012.pdf [file jitc-2020-001250supp012.pdf]
