# Supplementary figures and images for: Nicotinamide combined with gemcitabine is an immunomodulatory therapy that restrains pancreatic cancer in mice
Source: HighWire-hosted journal article supplement (doi:10.1136/jitc-2020-001250), 2020-11-01

**Figure S9**

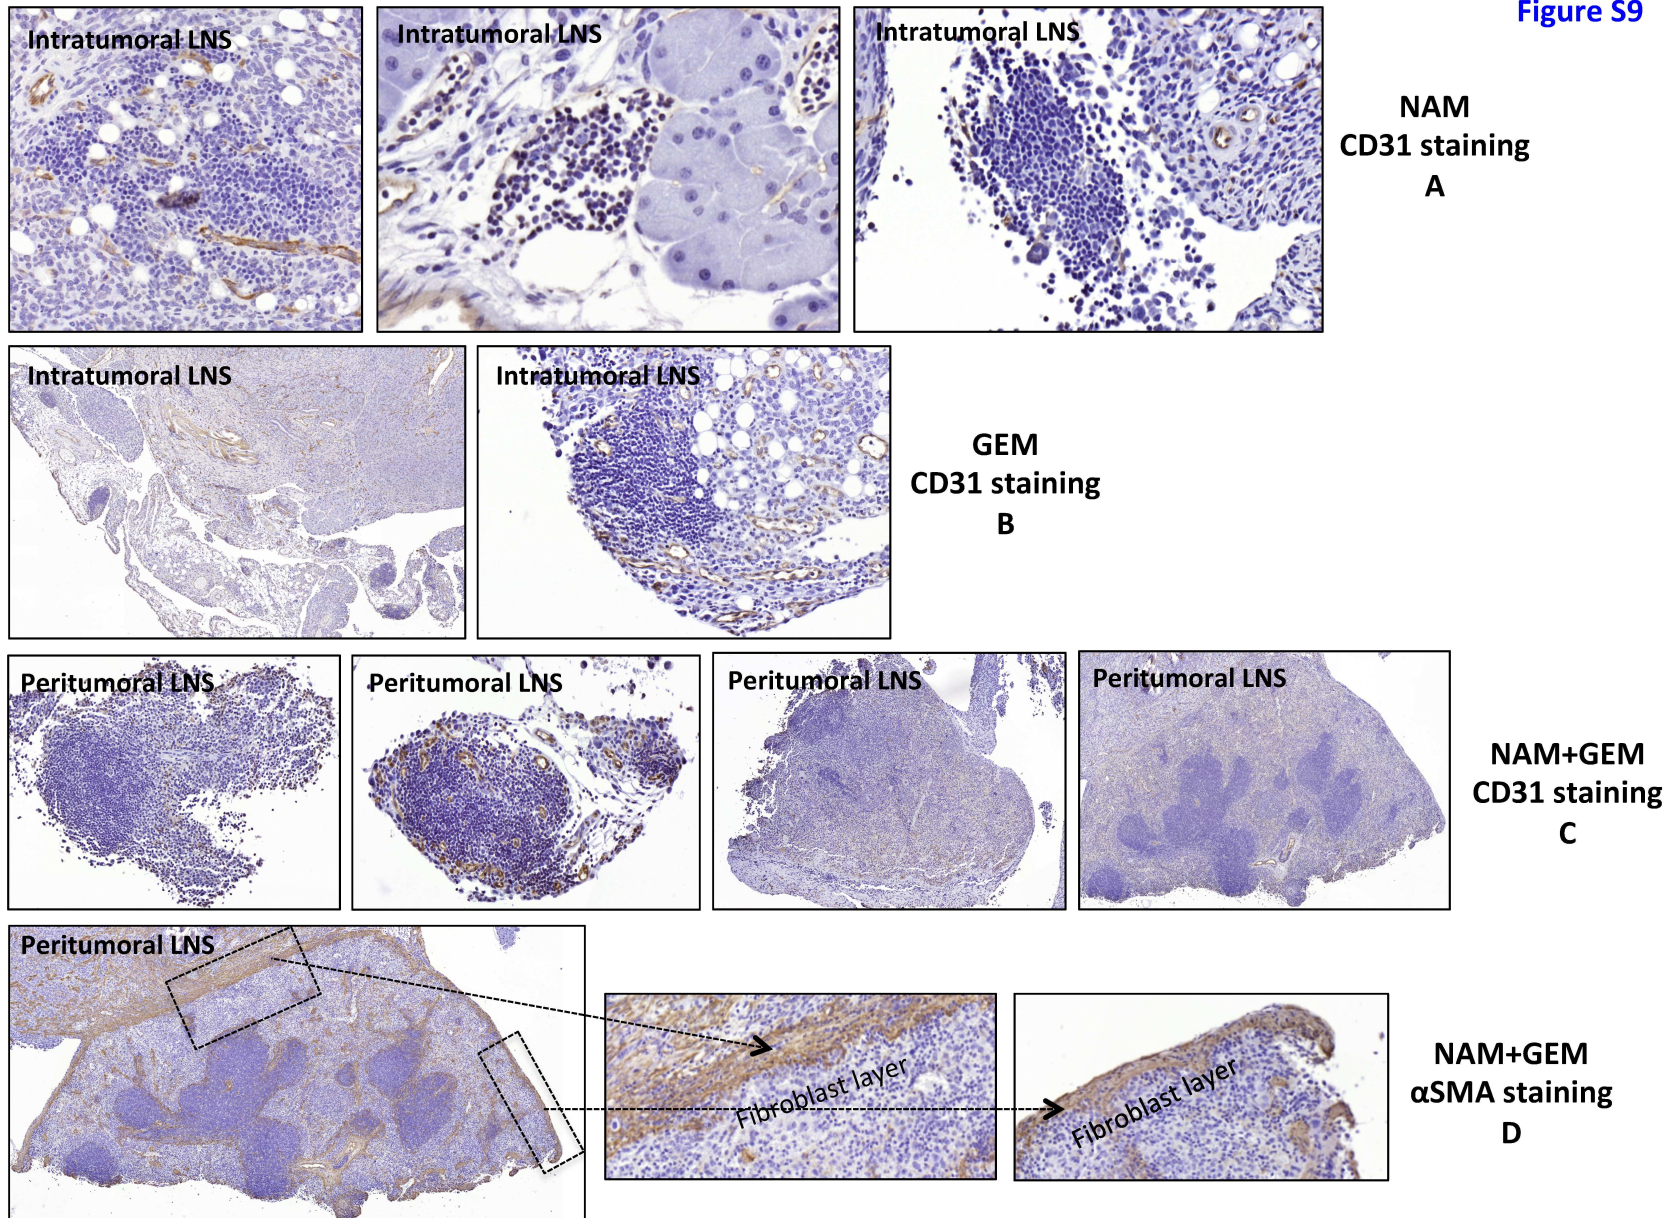

Supplement: jitc-2020-001250supp011_data_supplement.pdf [file jitc-2020-001250supp011_data_supplement.pdf]

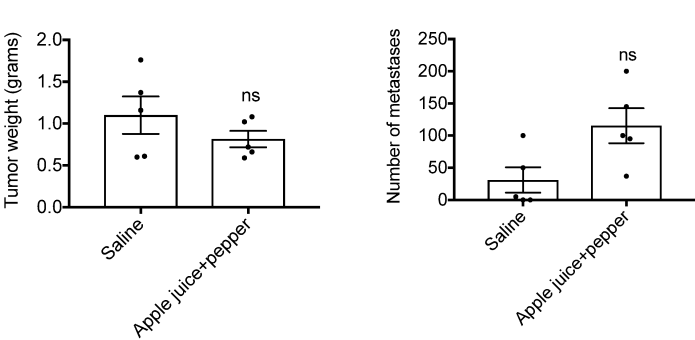

Figure S2

Supplement: jitc-2020-001250supp004_data_supplement.pdf [file jitc-2020-001250supp004_data_supplement.pdf]

Figure S4A

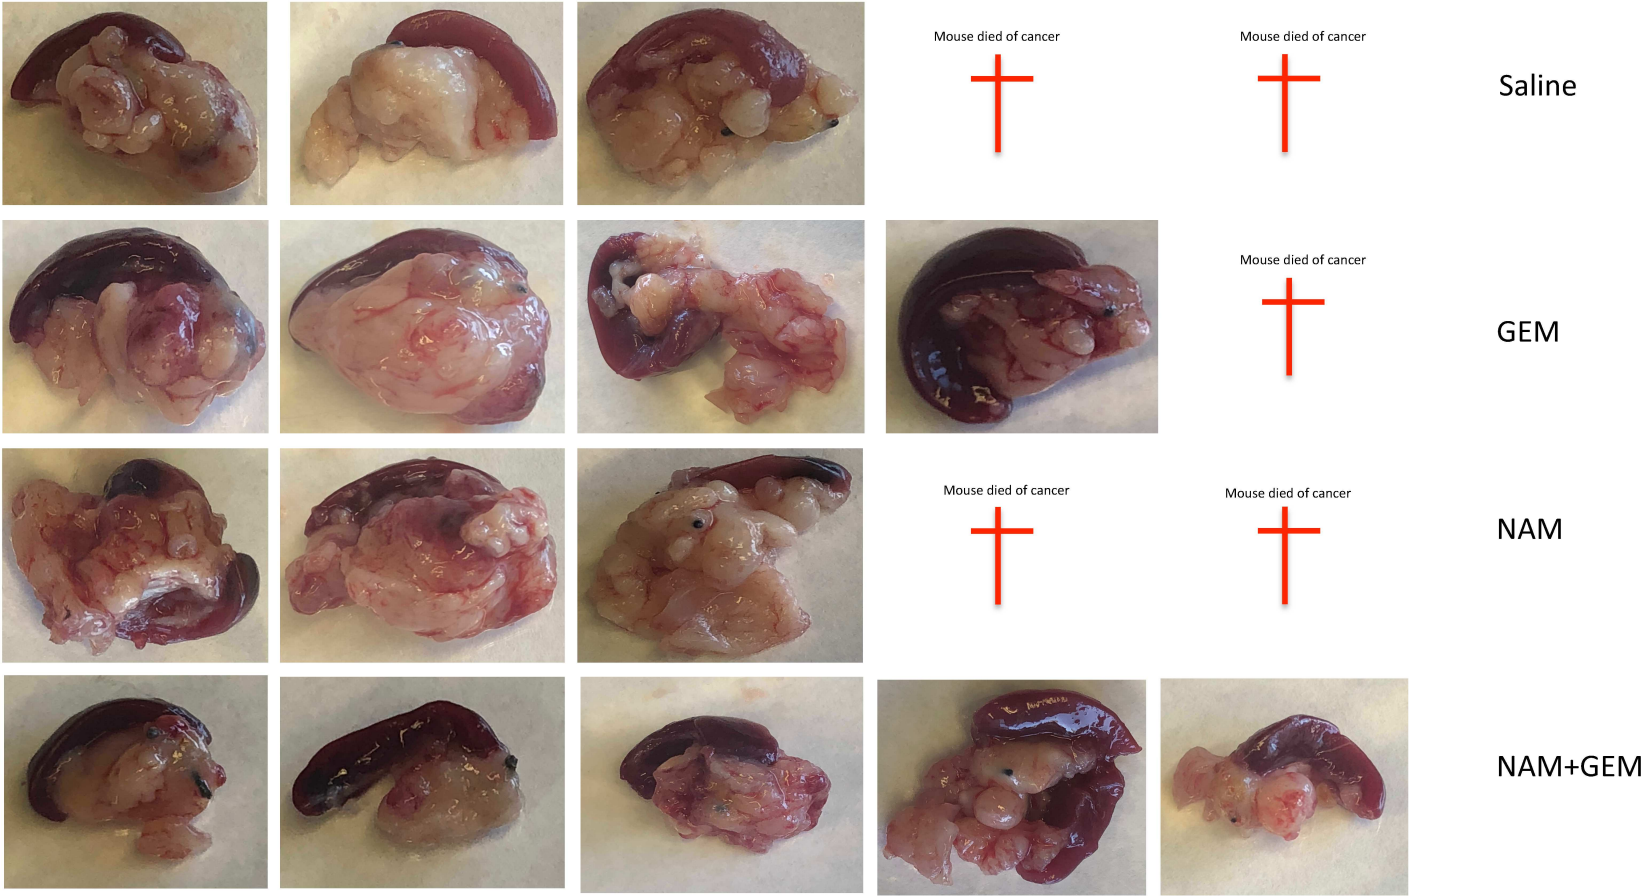

Orthotopic KPC model

Figure S4B

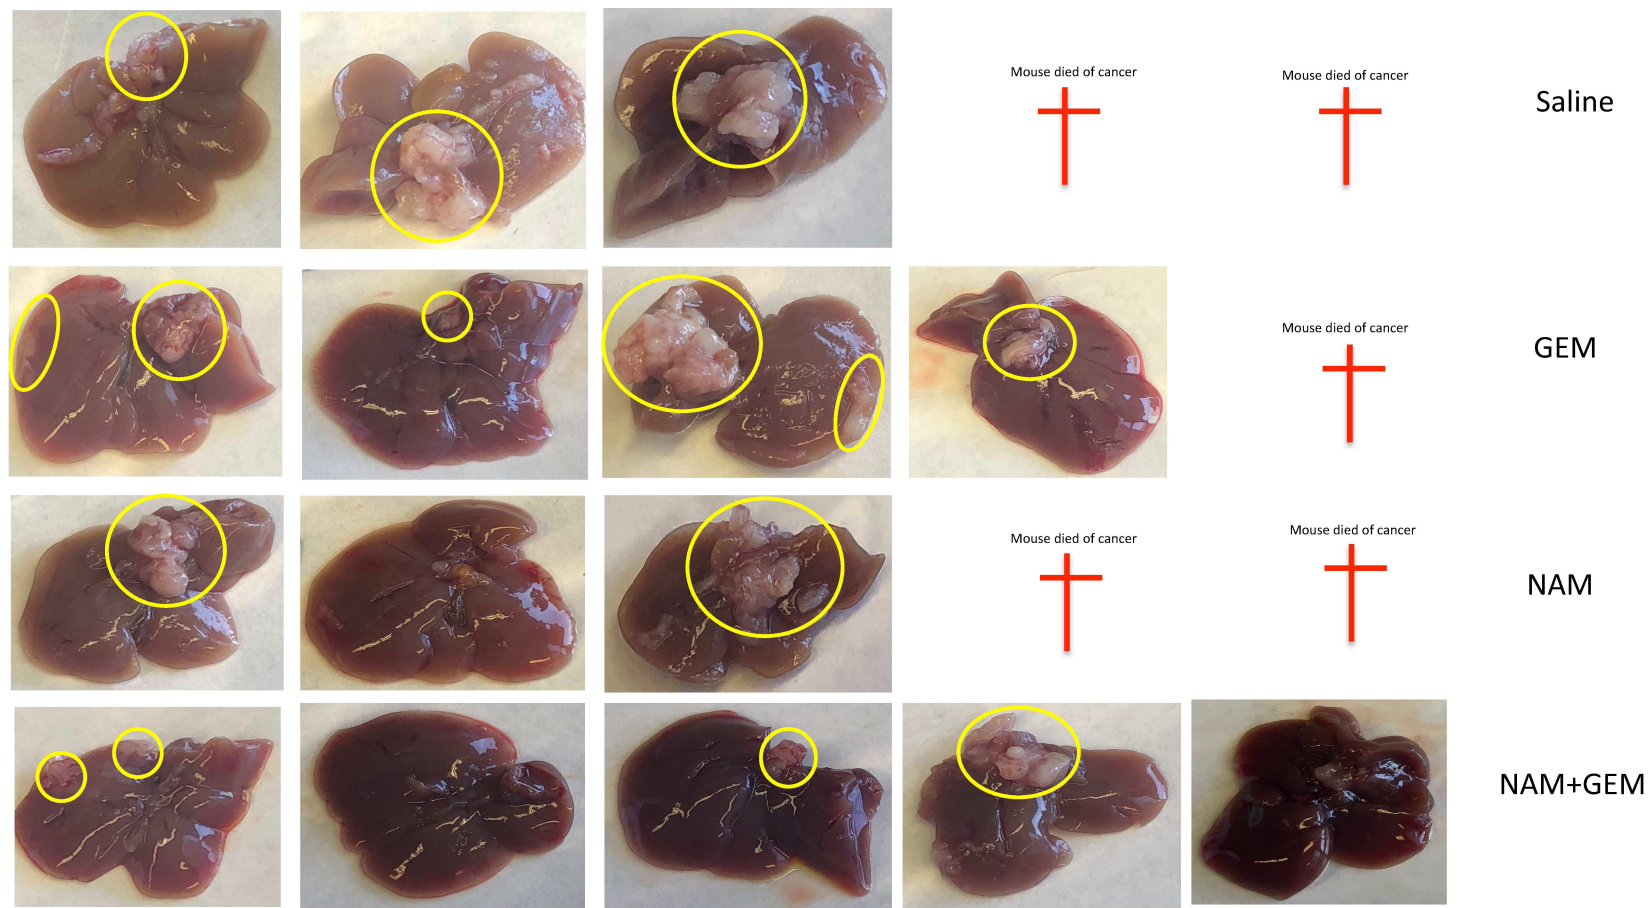

Orthotopic KPC model

Supplement: jitc-2020-001250supp006_data_supplement.pdf [file jitc-2020-001250supp006_data_supplement.pdf]
